# Supplementary material for: The Role of Alcohol, LPS Toxicity, and ALDH2 in Dental Bony Defects
Source: MDPI journal article supplement (doi:10.3390/biom11050651), 2021-04-28
Supplement: s1 [file s1]

## Supporting Information

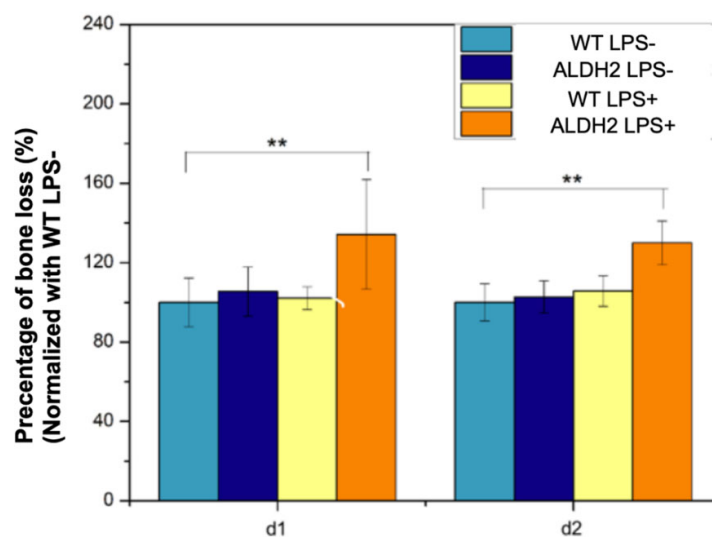

**Figure S1.** Comparison of percentage of periodontal bone loss in each group mice. The percentage of bone loss in the control group non LPS injected right side upper 1<sup>st</sup> molar and 2<sup>nd</sup> molar interdental area (WT LPS-, d1) was calculated as 100% and the other distance measured were compared with it. (\*All data compared with WT LPS-. Statistical analysis was performed by One-way ANOVA and post hoc analysis. Asterisk denotes significant differences \*\*P<0.01, n=4, standard error  $\pm$  10%).

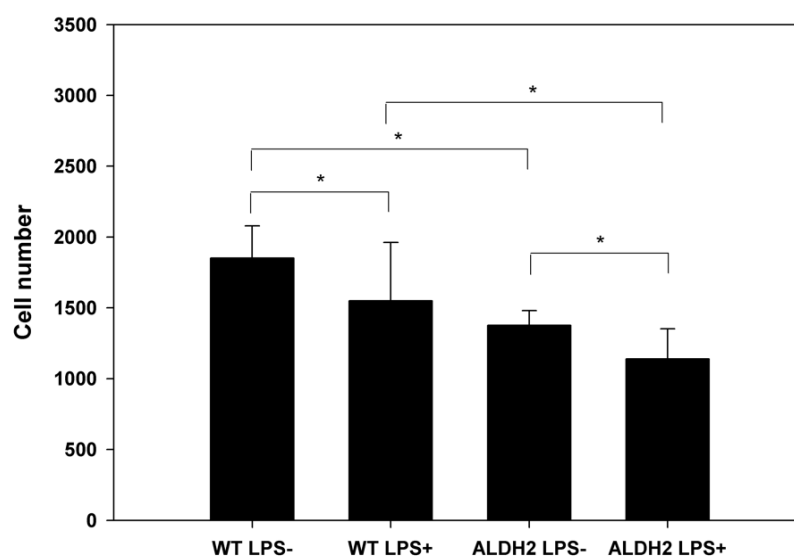

**Figure S2.** Quantitative analysis from H&E images from Figure 5 of LPS injection on the osteoblasts growth in the periodontal tissue of wild type mice and ALDH2\*2 knockin mice under alcohol intake. \*Asterisk denotes significant differences \*p< 0.05, n= 4, standard error  $\pm$  250).
